# Supplementary material for: Noise-induced plasticity of KCNQ2/3 and HCN channels underlies vulnerability and resilience to tinnitus
Source: eLife journal article supplement (doi:10.7554/elife.07242), 2015-08-27
Supplement: supp [file elife-07242-supp-v1.zip]

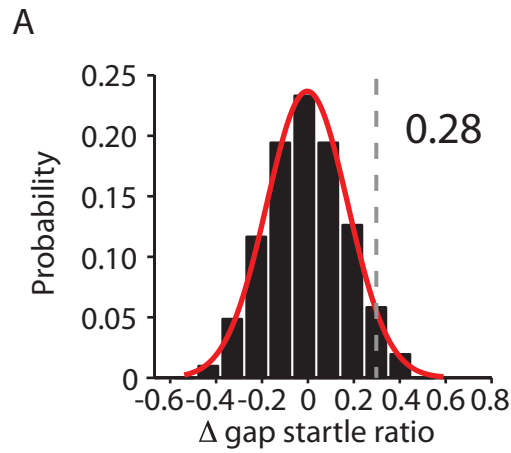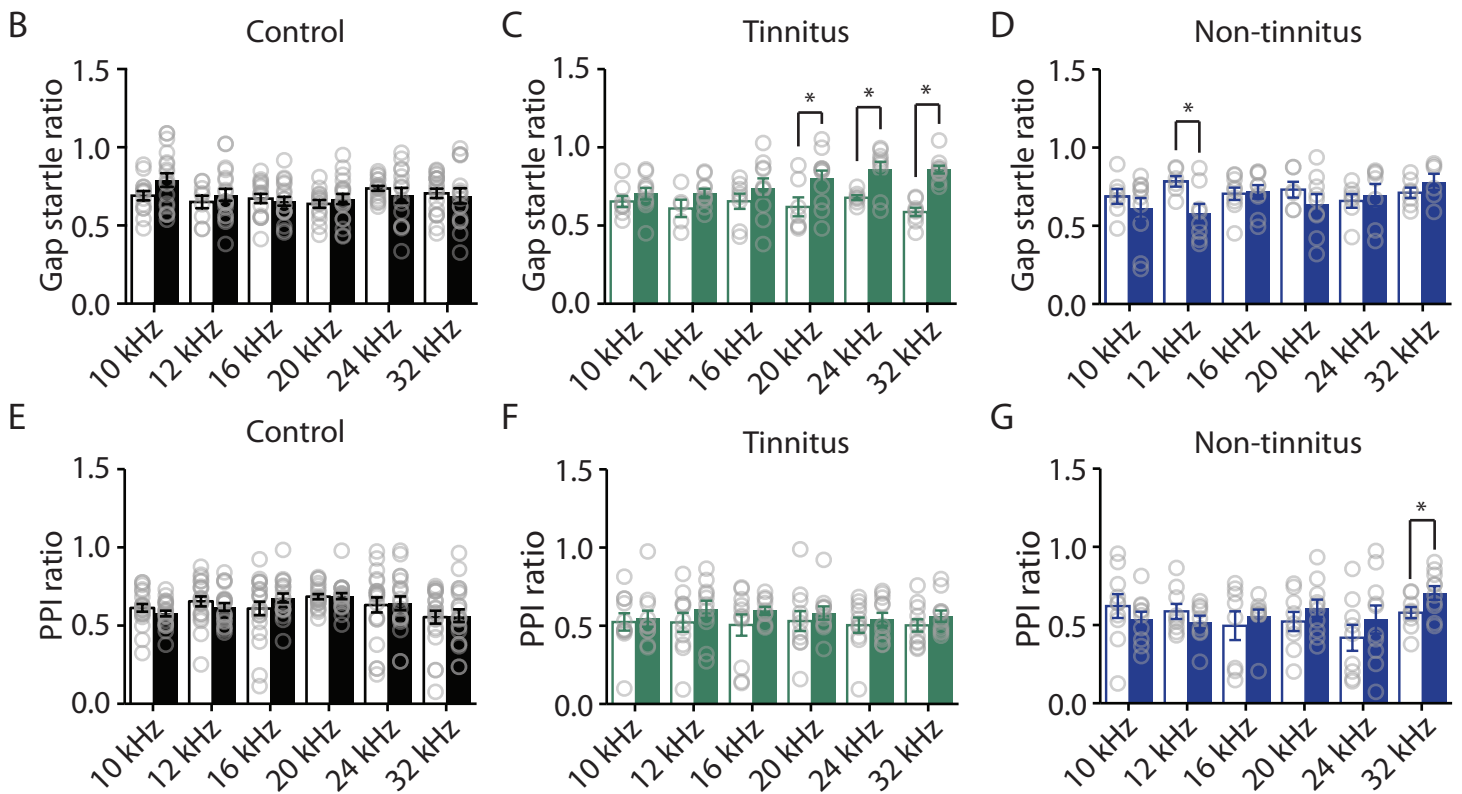

Open bar: before sham or noise exposure  
 Filled bar: one week after sham or noise exposure

Figure 1 - figure supplement 1
