# Supplementary material for: Noise-induced plasticity of KCNQ2/3 and HCN channels underlies vulnerability and resilience to tinnitus
Source: eLife journal article supplement (doi:10.7554/elife.07242), 2015-08-27
Supplement: supp [file elife-07242-supp-v1.zip]

Archive with 4 entries (4 files):
- elife_poa_e07242_Figure_7_figure_supplement_1.pdf
- elife_poa_e07242_Figure_1_figure_supplement_1.pdf
- elife_poa_e07242_Figure_8_figure_supplement_1.pdf
- elife_poa_e07242_Supplementary_File_1.pdf
