# Supplementary material for: Noise-induced plasticity of KCNQ2/3 and HCN channels underlies vulnerability and resilience to tinnitus
Source: eLife journal article supplement (doi:10.7554/elife.07242), 2015-08-27
Supplement: supp [file elife-07242-supp-v1.zip › elife_poa_e07242_Supplementary_File_1.pdf]

**Table 1. Spike parameters of fusiform cells from control and non-tinnitus mice**

|              | Spike threshold    | Spike amplitude   | Depolarization slope | Hyperpolarization slope | Half height width  | fAHP              |
|--------------|--------------------|-------------------|----------------------|-------------------------|--------------------|-------------------|
| Control      | $-47.1 \pm 0.5$ mV | $40.6 \pm 1.2$ mV | $219.2 \pm 7.5$ V/s  | $-165.3 \pm 5.5$ V/s    | $0.31 \pm 0.01$ ms | $22.0 \pm 1.3$ mV |
| Non-tinnitus | $-48.4 \pm 0.7$ mV | $40.5 \pm 1.6$ mV | $206.0 \pm 7.6$ V/s  | $-152.0 \pm 3.7$ V/s    | $0.33 \pm 0.01$ ms | $22.7 \pm 0.8$ mV |

fAHP: fast afterhyperpolarization

Depolarization slope: maximum depolarizing slope

Hyperpolarization slope: minimum hyperpolarizing slope
