# Supplementary figures and images for: Noise-induced plasticity of KCNQ2/3 and HCN channels underlies vulnerability and resilience to tinnitus
Source: eLife journal article supplement (doi:10.7554/elife.07242), 2015-08-27

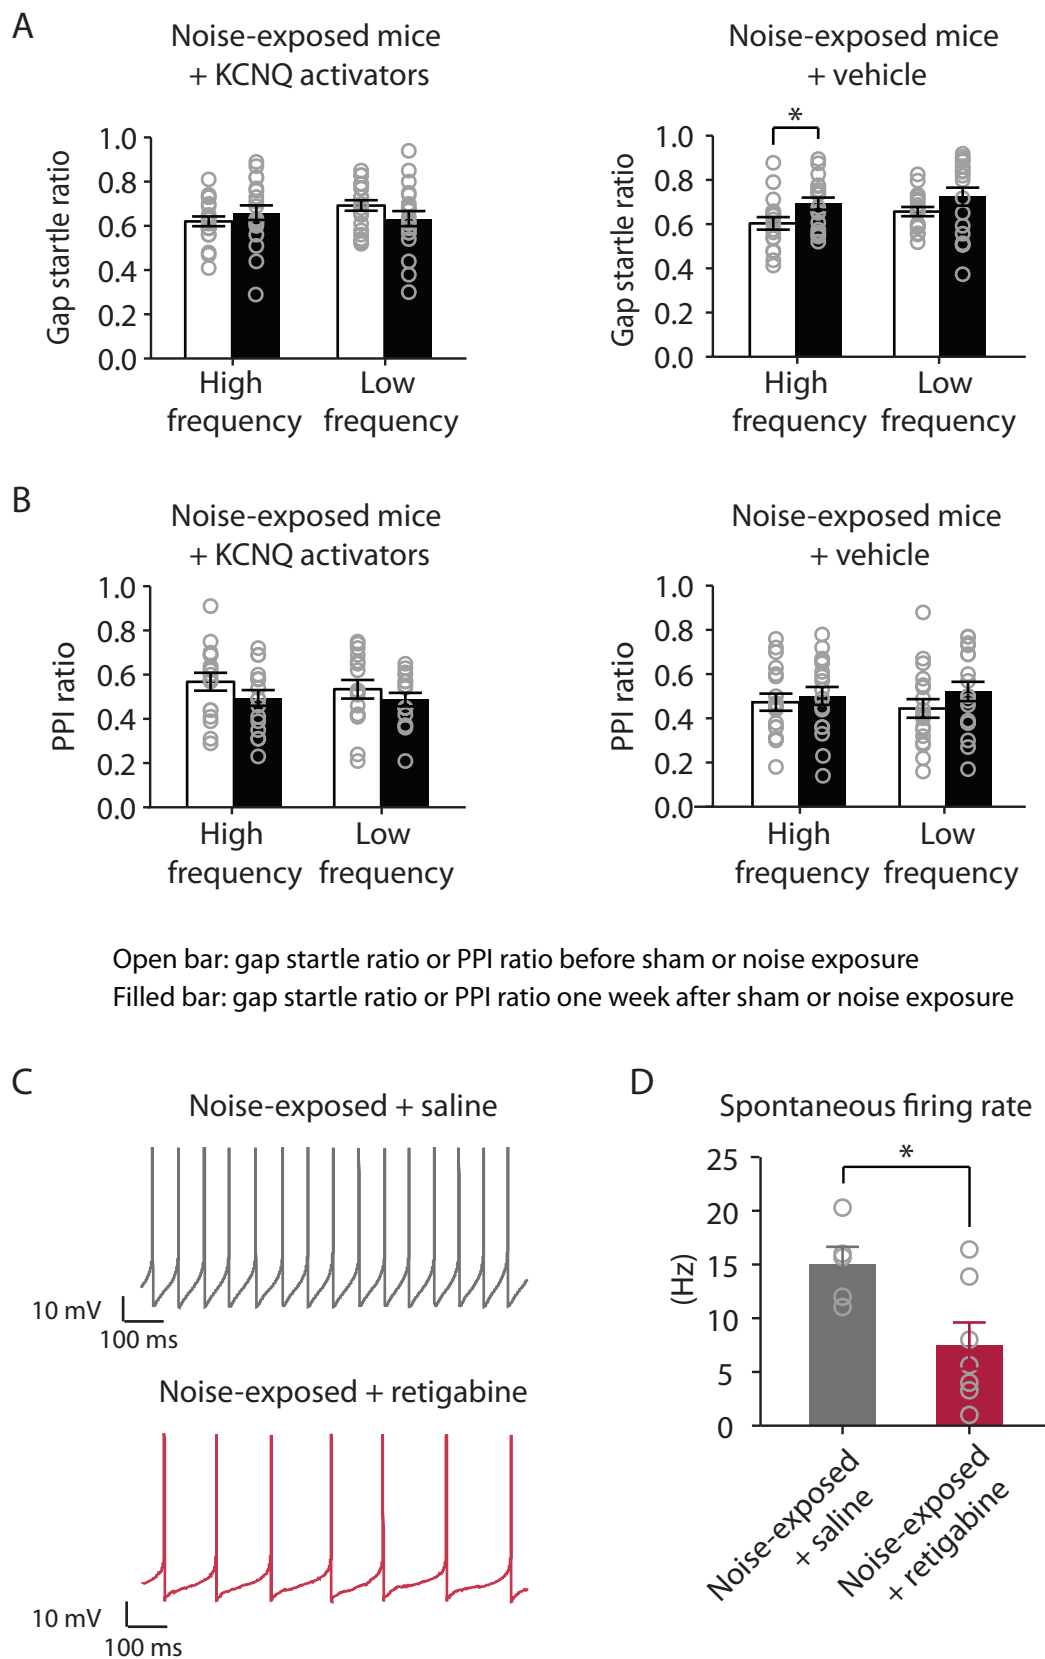

Figure 7 - figure supplement 1

Supplement: supp [file elife-07242-supp-v1.zip › elife_poa_e07242_Figure_7_figure_supplement_1.pdf]

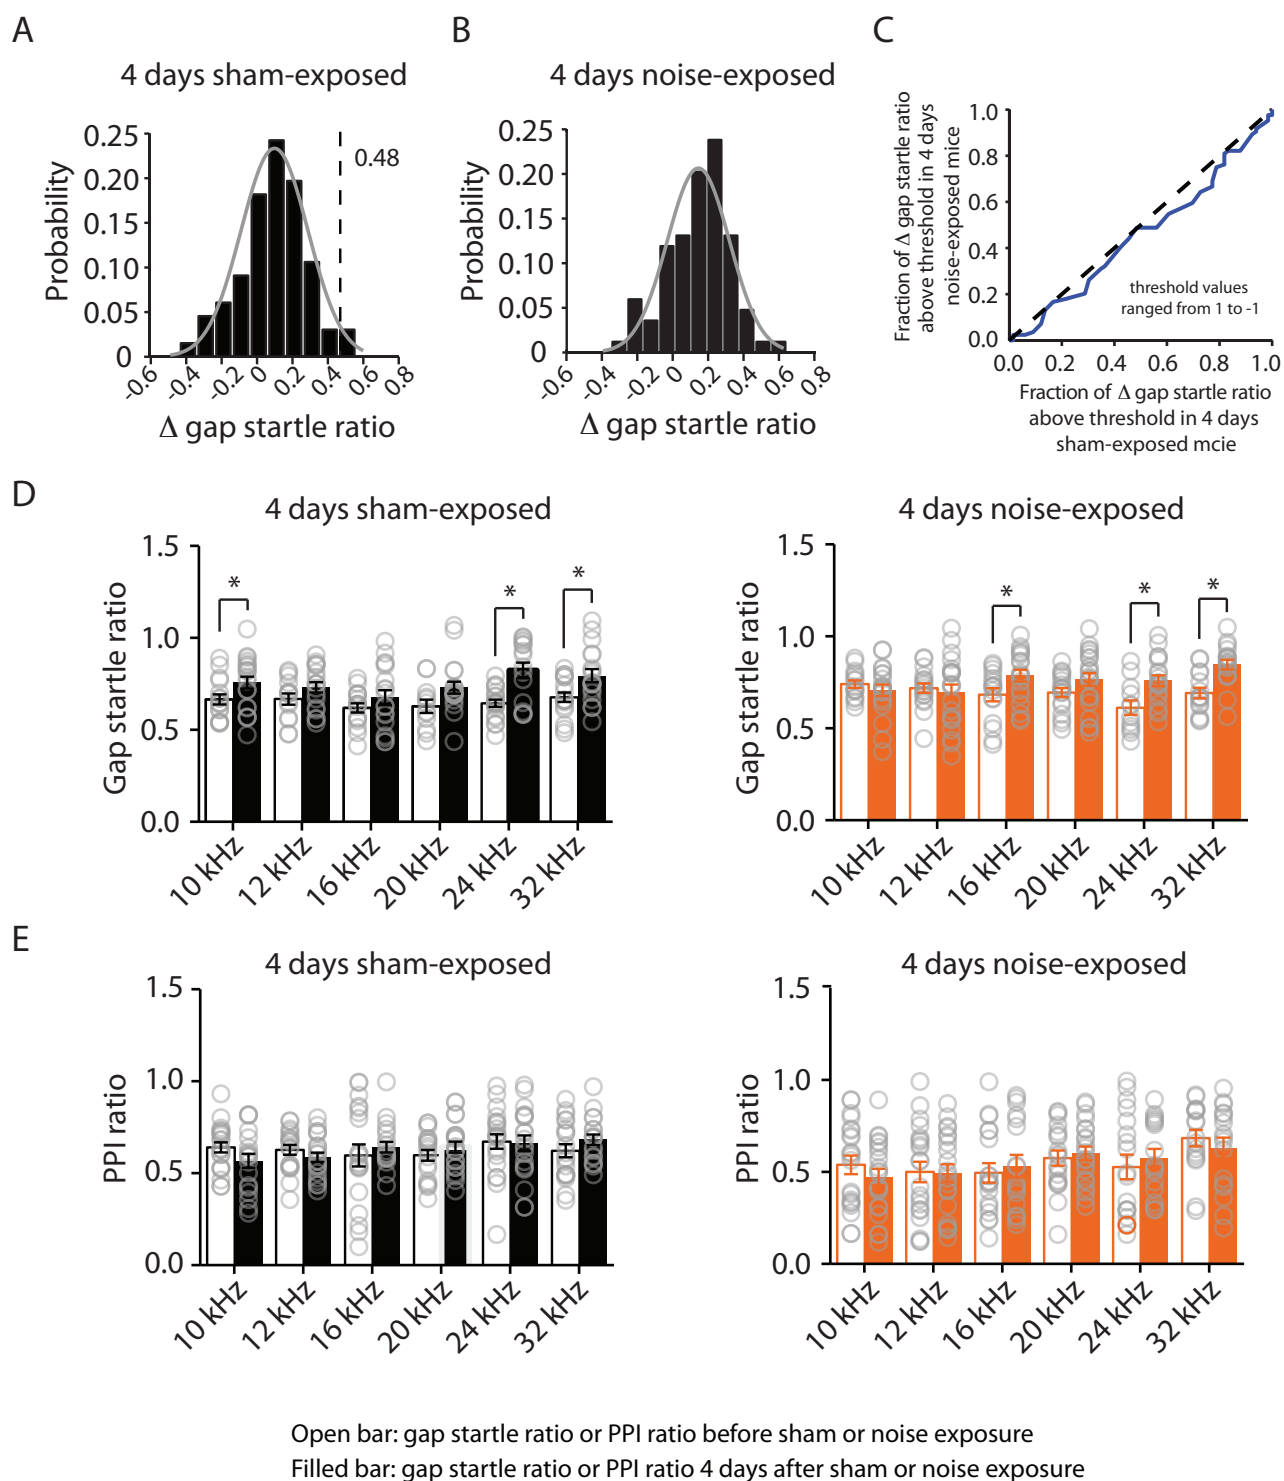

Figure 8 - figure supplement 1

Supplement: supp [file elife-07242-supp-v1.zip › elife_poa_e07242_Figure_8_figure_supplement_1.pdf]
